# Supplementary material for: Met Is the Most Frequently Amplified Gene in Endometriosis-Associated Ovarian Clear Cell Adenocarcinoma and Correlates with Worsened Prognosis
Source: PubMed Central journal article supplement (PMC3587638; doi:10.1371/journal.pone.0057724), 2013-03-04

## Chromosome 20

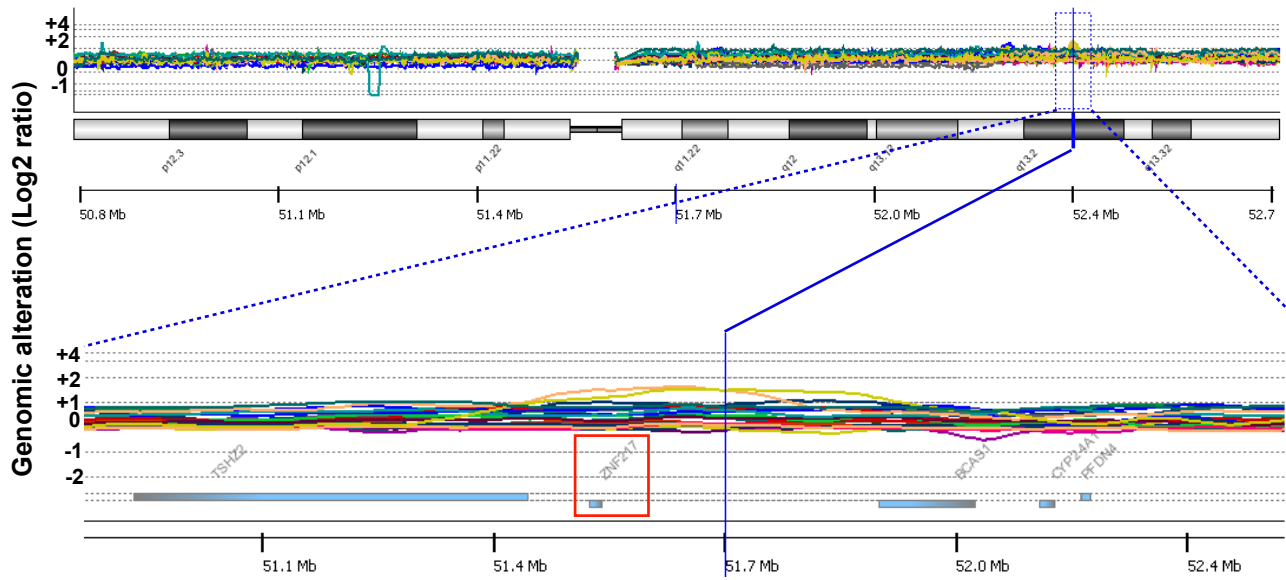

## Chromosome 17

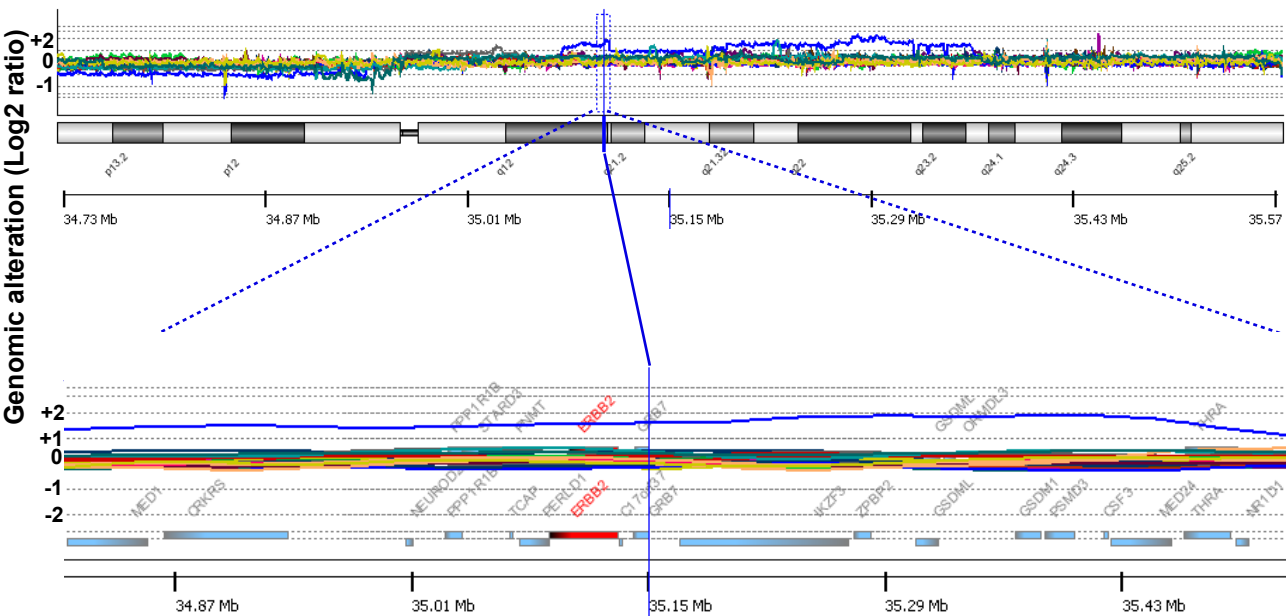

Supplement: pone.0057724.s002.pdf [file pone.0057724.s002.pdf]
